# Supplementary material for: Overcoming Resistance of Cancer Cells to PARP-1 Inhibitors with Three Different Drug Combinations
Source: PubMed Central journal article supplement (PMC4873128; doi:10.1371/journal.pone.0155711), 2016-05-19
Supplement: pone.0155711.s010.pdf [file pone.0155711.s010.pdf]

| <b>Cell Lines</b> | <b>V:ABT-888</b> | <b>ED50</b> | <b>ED75</b> | <b>ED90</b> | <b>ED95</b> |
|-------------------|------------------|-------------|-------------|-------------|-------------|
| <b>MDA-MB-231</b> | 1:14             | 0.53        | 0.45        | 0.39        | 0.36        |
| <b>BT-549</b>     | 1:32             | 0.8         | 0.67        | 0.56        | 0.50        |
| <b>MCF-7</b>      | 1:4              | 0.59        | 0.60        | 0.66        | 0.70        |
| <b>U-87</b>       | 1:20             | 0.42        | 0.35        | 0.30        | 0.26        |
