# Supplementary material for: Overcoming Resistance of Cancer Cells to PARP-1 Inhibitors with Three Different Drug Combinations
Source: PubMed Central journal article supplement (PMC4873128; doi:10.1371/journal.pone.0155711), 2016-05-19
Supplement: pone.0155711.s011.pdf [file pone.0155711.s011.pdf]

| <b>ABT-888:<br/>Salubrinal</b> | <b>ED50</b> | <b>ED75</b> | <b>ED90</b> | <b>ED95</b> |
|--------------------------------|-------------|-------------|-------------|-------------|
| <b>1:1.5</b>                   | 0.83        | 0.67        | 0.62        | 0.62        |
