# Supplementary material for: Overcoming Resistance of Cancer Cells to PARP-1 Inhibitors with Three Different Drug Combinations
Source: PubMed Central journal article supplement (PMC4873128; doi:10.1371/journal.pone.0155711), 2016-05-19
Supplement: pone.0155711.s012.pdf [file pone.0155711.s012.pdf]

|                            | <b>C</b> | <b>C</b> | <b>V</b> | <b>V</b> | <b>ABT-888</b> | <b>ABT-888</b> | <b>ABT-888+V</b> | <b>ABT-888+V</b> | <b>Normal range*</b> |
|----------------------------|----------|----------|----------|----------|----------------|----------------|------------------|------------------|----------------------|
| <b>WBC (10*3/μl)</b>       | 19.9     | 6.2      | 4.1      | 10.7     | 8.7            | 8.4            | 8.1              | 14.2             | <b>3.2-12.7</b>      |
| <b>HGB (g/dl)</b>          | 14.6     | 14.3     | 12.3     | 13.5     | 15             | 14.6           | 15.1             | 13.6             | <b>11.8-14.9</b>     |
| <b>Hematocrit (%)</b>      | 45.2     | 46.8     | 42       | 44.4     | 49.2           | 49.2           | 53.2             | 45.7             | <b>36.7-46.8</b>     |
| <b>MCV (fL)</b>            | 56.7     | 57.1     | 65.6     | 68.6     | 56             | 60.4           | 66.6             | 64.9             | <b>42.2-59.2</b>     |
| <b>Neutroph (%)</b>        | 70       | 24       | 48       | 64       | 49             | 57             | 59               | 70               | <b>7-31</b>          |
| <b>Lymph (%)</b>           | 30       | 76       | 52       | 35       | 51             | 41             | 41               | 30               | <b>70-95</b>         |
| <b>Platelets (10*3/μl)</b> | 1447     | 933      | 924      | 1318     | 767            | 201            | 868              | 1535             | <b>766-1659</b>      |
