# Supplementary material for: Overcoming Resistance of Cancer Cells to PARP-1 Inhibitors with Three Different Drug Combinations
Source: PubMed Central journal article supplement (PMC4873128; doi:10.1371/journal.pone.0155711), 2016-05-19
Supplement: pone.0155711.s013.pdf [file pone.0155711.s013.pdf]

|                              | <b>C</b> | <b>C</b> | <b>V</b> | <b>V</b> | <b>ABT-888</b> | <b>ABT-888</b> | <b>ABT-888 +V</b> | <b>ABT-888 +V</b> | <b>Normal range*</b> |
|------------------------------|----------|----------|----------|----------|----------------|----------------|-------------------|-------------------|----------------------|
| <b>Creatinine mg/dl</b>      | 0.15     | 0.13     | 0.21     | 0.09     | 0.12           | 0.15           | 0.21              | 0.13              | <b>0.1-0.4</b>       |
| <b>Calcium mg/dl</b>         | 10.9     | 10.3     | 11.6     | 11.2     | 10.2           | 11.1           | 10.6              | 11.4              | <b>8.3-10.9</b>      |
| <b>Phosphate mg/dl</b>       | 9.8      | 13.1     | 10.8     | 11.6     | 8.3            | 11.7           | 9.1               | 8.1               | <b>5.2-13</b>        |
| <b>Glucose mg/dl</b>         | 121      | 138      | 150      | 75       | 176            | 289            | 201               | 155               | <b>46-237</b>        |
| <b>Urea mg/dl</b>            | 46.1     | 35.9     | 35.1     | 51.3     | 42             | 39.9           | 53.4              | 46.8              | <b>28-76</b>         |
| <b>Cholesterol mg/dl</b>     | 141      | 115      | 136      | 106      | 152            | 154            | 147               | 95                | <b>51-148</b>        |
| <b>Protein g/dl</b>          | 5.53     | 5.13     | 6.06     | 5.79     | 5.55           | 5.76           | 6.18              | 6.05              | <b>4.5-6.8</b>       |
| <b>Albumin g/dl</b>          | 2.4      | 3        | 3.3      | 3.1      | 3.5            | 2.9            | 2.8               | 2.7               | <b>2-2.4</b>         |
| <b>Globulin g/dl</b>         | 3.1      | 2.1      | 2.8      | 2.7      | 2.1            | 2.9            | 3.4               | 3.3               | <b>1.7-4.4</b>       |
| <b>Total Bilirubin mg/dl</b> | 0.08     | 0.09     | 0.03     | 0.11     | 0.07           | 0.9            | 0.75              | 0.06              | <b>0.1-0.3</b>       |
| <b>Alkaline Phos IU/L</b>    | 39       | 114      | 51       | 41       | 71             | 69             | 60                | 39                | <b>56-356</b>        |
| <b>SGOT IU/L</b>             | 122      | 79       | 140      | 69       | 80             | 99             | 118               | 81                | <b>38-361</b>        |
| <b>SGPT IU/L</b>             | 36       | 31       | 36       | 17       | 31             | 33             | 35                | 18                | <b>22-296</b>        |
| <b>Sodium mmol/L</b>         | 161      | 156      | 160      | 160      | 158            | 158            | 163               | 160               | <b>149-167</b>       |
| <b>Potassium mmol/L</b>      | 9.1      | 9.6      | 8.6      | 9.7      | 7.3            | 10.3           | 7.8               | 7.4               | <b>4.9-9.5</b>       |
| <b>Cholesterol mmol/L</b>    | 107      | 109      | 110      | 108      | 108            | 106            | 109               | 106               | <b>106-123</b>       |
