# Supplementary material for: Overcoming Resistance of Cancer Cells to PARP-1 Inhibitors with Three Different Drug Combinations
Source: PubMed Central journal article supplement (PMC4873128; doi:10.1371/journal.pone.0155711), 2016-05-19
Supplement: pone.0155711.s014.pdf [file pone.0155711.s014.pdf]

| <b>Cell Lines</b> | <b>V:6-TG</b> | <b>ED50</b> | <b>ED75</b> | <b>ED90</b> | <b>ED95</b> |
|-------------------|---------------|-------------|-------------|-------------|-------------|
| <b>MDA-MB-231</b> | 1:0.028       | 0.19        | 0.19        | 0.19        | 0.19        |
| <b>BT-549</b>     | 1:10          | 0.72        | 0.70        | 0.67        | 0.66        |
| <b>U-87</b>       | 1:4           | 0.19        | 0.24        | 0.29        | 0.35        |
