# Supplementary material for: Overcoming Resistance of Cancer Cells to PARP-1 Inhibitors with Three Different Drug Combinations
Source: PubMed Central journal article supplement (PMC4873128; doi:10.1371/journal.pone.0155711), 2016-05-19
Supplement: pone.0155711.s015.pdf [file pone.0155711.s015.pdf]

|                            | <b>C</b> | <b>V</b> | <b>6-TG</b> | <b>6-TG</b> | <b>V+6-TG</b> | <b>V+6-TG</b> | <b>V+6-TG</b> | <b>V+6-TG</b> | <b>normal range*</b> |
|----------------------------|----------|----------|-------------|-------------|---------------|---------------|---------------|---------------|----------------------|
| <b>WBC (10*3/μl)</b>       | 11.8     | 4.6      | 5.4         | 2.2         | 3.5           | 2.6           | 6.9           | 5             | <b>3.2-12.7</b>      |
| <b>HGB (g/dl)</b>          | 15       | 14.4     | 10.9        | 10.7        | 7.1           | 5             | 5.9           | 10            | <b>11.8-14.9</b>     |
| <b>Hematocrit (%)</b>      | 46       | 46.4     | 33.6        | 33.9        | 24.9          | 17.2          | 21.1          | 34.3          | <b>36.7-46.8</b>     |
| <b>MCV (fL)</b>            | 56.4     | 61.6     | 64.5        | 65.3        | 84.4          | 81.1          | 79.9          | 81.1          | <b>42.2-59.2</b>     |
| <b>Neutrophils (%)</b>     | 21       | 58       | 52          | 35          | 68            | 55            | 31            | 42            | <b>7-31</b>          |
| <b>Lymphocytes (%)</b>     | 76       | 40       | 45          | 62          | 28            | 43            | 69            | 58            | <b>70-95</b>         |
| <b>Platelets (10*3/μl)</b> | 1259     | 1270     | 703         | 994         | 182           | 1109          | 935           | 1315          | <b>766-1659</b>      |
