# Supplementary material for: Overcoming Resistance of Cancer Cells to PARP-1 Inhibitors with Three Different Drug Combinations
Source: PubMed Central journal article supplement (PMC4873128; doi:10.1371/journal.pone.0155711), 2016-05-19
Supplement: pone.0155711.s016.pdf [file pone.0155711.s016.pdf]

|                                  | <b>C</b> | <b>V</b> | <b>6-TG</b> | <b>V+6-TG</b> | <b>V+6-TG</b> | <b>V+6-TG</b> | <b>V+6-TG</b> | <b>Normal range*</b> |
|----------------------------------|----------|----------|-------------|---------------|---------------|---------------|---------------|----------------------|
| <b>Creatinine mg/dl</b>          | 0.19     | 0.18     | 0.14        | N.D           | 0.11          | 0.14          | 0.14          | <b>0.1-0.4</b>       |
| <b>Calcium mg/dl</b>             | 9.8      | 9.9      | 9.9         | 9.4           | 9.85          | 10.5          | 10.8          | <b>8.3-10.9</b>      |
| <b>Phosphate mg/dl</b>           | 8.3      | 9        | 12.7        | 10            | 12.1          | 6.9           | 9.7           | <b>5.2-13</b>        |
| <b>Glucose mg/dl</b>             | 114      | 145      | 135         | 124           | 125           | 225           | 277           | <b>46-237</b>        |
| <b>Urea mg/dl</b>                | 46       | 65.6     | 55.6        | 53.6          | 61.2          | 64.5          | 64.1          | <b>28-76</b>         |
| <b>Cholesterol mg/dl</b>         | 120      | 103      | 121         | 104           | 103           | 114           | 97            | <b>51-148</b>        |
| <b>Protein g/dl</b>              | 5.31     | 5.3      | 5.31        | 4.46          | 4.11          | 5.59          | 5.55          | <b>4.5-6.8</b>       |
| <b>Albumin g/dl</b>              | 3.7      | 3.5      | 3.6         | 2.7           | 2.6           | 3.9           | 3.8           | <b>2-2.4</b>         |
| <b>Globulin g/dl</b>             | 1.6      | 1.8      | 1.7         | 1.7           | 1.5           | 1.7           | 1.75          | <b>1.7-4.4</b>       |
| <b>Total Bilirubin mg/dl</b>     | 0.1      | 0.07     | 0.07        | 0.56          | 0.05          | 0.08          | 0.1           | <b>0.1-0.3</b>       |
| <b>Alkaline Phosphatase IU/L</b> | 99       | 94       | 81          | 54            | 35            | 84            | 83            | <b>56-356</b>        |
| <b>SGOT IU/L</b>                 | 116      | 111      | 73          | 206           | 219           | 335           | 71            | <b>38-361</b>        |
| <b>SGPT IU/L</b>                 | 26       | 34       | 22          | 36            | 37            | 34            | 14            | <b>22-296</b>        |
| <b>Sodium mmol/L</b>             | 155      | 154      | 151         | 150           | 156           | 151           | 154           | <b>149-167</b>       |
| <b>Potassium mmol/L</b>          | 6.2      | 5.8      | 7           | 6.8           | 6.9           | 9.9           | 9.1           | <b>4.9-9.5</b>       |
| <b>Cholesterol mmol/L</b>        | 109      | 106      | 110         | 100           | 113           | 115           | 108           | <b>106-123</b>       |
